# Supplementary material
Source: Springer Nature journal article supplement (https://www.springermedizin.de/resource/supplementary/40248_2014_200_MOESM12_ESM.pdf/9686204)

1 = not important

6 = very important

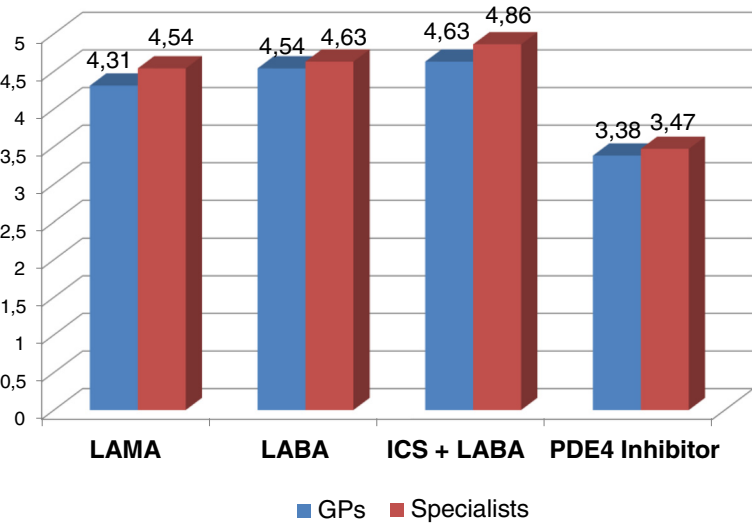

Supplement: MOESM12 [file 9686204]
